# Supplementary material for: Phylogeny of Maleae (Rosaceae) Based on Multiple Chloroplast Regions: Implications to Genera Circumscription
Source: Hindawi journal article supplement (doi:10.1155/2018/7627191), 2018-01-01
Supplement: f1 [file 7627191.f1.pdf]

Supplementary Table S1. Sequences downloaded from GenBank in this study with public database accession numbers.

| Taxon                                                             | <i>atpB-rbcL</i> | <i>matK</i> | <i>ndhF</i> | <i>rpl16</i> | <i>rps16</i> | <i>trnL-trnF</i> |
|-------------------------------------------------------------------|------------------|-------------|-------------|--------------|--------------|------------------|
| <i>Chamaemeles coriacea</i> Lindl.                                | -                | DQ860454    | DQ851507    | DQ860423     | DQ848689     | DQ863226         |
| <i>Chamaespilus alpina</i> (Mill.) K. R. Robertson & J. B. Phipps | DQ860485         | DQ860455    | DQ851508    | DQ860424     | DQ848690     | DQ863227         |
| <i>Cormus domestica</i> (L.) Spach                                | DQ860486         | DQ860456    | DQ851509    | DQ860425     | DQ848691     | DQ863228         |
| <i>Heteromeles arbutifolia</i> (Dryand.) M. Roem.                 | -                | -           | -           | -            | DQ848699     | -                |
| <i>Malacomeles denticulata</i> (Kunth) G. N. Jones                | DQ860495         | DQ860465    | DQ851530    | DQ860434     | DQ848700     | DQ863237         |
| <i>Tormalis clusii</i> (M.Roem.) K. R. Robertson & J. B. Phipps   | DQ860506         | DQ860477    | DQ851559    | DQ851559     | DQ848712     | DQ863249         |

Supplementary Table S2. Newly generated sequences with GenBank accession numbers in this study.

| Taxon                                                              | <i>petA-psbJ</i> | <i>rbcL</i> | <i>rpl16</i> | <i>rpl20-rps2</i> | <i>rps16</i> | <i>trnC-ycf6</i> | <i>trnD-psbM</i> | <i>trnH-psbA</i> | <i>trnH-rpl2</i> | <i>trnL-F</i> | <i>trnS-G</i> | <i>ycf1</i> | <i>atpB-rbcL</i> | <i>matK</i> | <i>ndhF</i> |
|--------------------------------------------------------------------|------------------|-------------|--------------|-------------------|--------------|------------------|------------------|------------------|------------------|---------------|---------------|-------------|------------------|-------------|-------------|
| <i>Sorbaria sorbifolia</i> (L.) A. Braun                           | MG703578         | MG703612    | MG703649     | MG703684          | MG703721     | MG703754         | MG703790         | MG703824         | MG703860         | MG703896      | MG703932      | MG703968    | MG704002         | MG704037    | MG704073    |
| <i>Prinsepia sinensis</i> (Oliv.) Oliv. ex Bean                    | MG703579         | MG703613    | MG703650     | MG703685          | MG703722     | MG703755         | MG703791         | MG703825         | MG703861         | MG703897      | MG703933      | MG703969    | MG704003         | MG704038    | MG704074    |
| <i>Rhodotypos scandens</i> (Thunb.) Makino                         | MG703580         | MG703614    | MG703651     | MG703686          | MG703723     | MG703756         | MG703792         | MG703826         | MG703862         | MG703898      | MG703934      | MG703970    | MG704004         | MG704039    | MG704075    |
| <i>Physocarpus amurensis</i> (Maxim.) Maxim.                       | MG703581         | MG703615    | MG703652     | MG703687          | MG703724     | MG703757         | MG703793         | MG703827         | MG703863         | MG703899      | MG703935      | MG703971    | MG704005         | MG704040    | MG704076    |
| <i>Spiraea pubescens</i> Turcz.                                    | MG703582         | MG703616    | MG703653     | MG703688          | MG703725     | MG703758         | MG703794         | MG703828         | MG703864         | MG703900      | MG703936      | MG703972    | MG704006         | MG704041    | MG704077    |
| <i>Rosa rugosa</i> Thunb.                                          | MG703583         | MG703617    | MG703654     | MG703689          | MG703726     | MG703759         | MG703795         | MG703829         | MG703865         | MG703901      | MG703937      | MG703973    | MG704007         | MG704042    | MG704078    |
| <i>Amelanchier arborea</i> (F. Michx.) Fernald                     | MG703584         | MG703618    | MG703655     | MG703690          | MG703727     | MG703760         | MG703796         | MG703830         | MG703866         | MG703902      | MG703938      | MG703974    | MG704008         | MG704043    | MG704079    |
| <i>Aria nivea</i> Host                                             | -                | MG703619    | -            | -                 | -            | -                | -                | MG703831         | -                | MG703903      | -             | -           | -                | MG704044    | -           |
| <i>Aronia melanocarpa</i> (Michx.) Elliott                         | MG703585         | MG703620    | MG703656     | MG703691          | MG703728     | MG703761         | MG703797         | MG703832         | MG703867         | MG703904      | MG703939      | MG703975    | MG704009         | MG704048    | MG704080    |
| <i>Chaenomeles speciosa</i> (Sweet) Nakai                          | MG703586         | MG703621    | MG703657     | MG703692          | MG703729     | MG703762         | MG703798         | MG703833         | MG703868         | MG703905      | MG703940      | MG703976    | MG704010         | MG704049    | MG704081    |
| <i>Cormus domestica</i> (L.) Spach                                 | MG703587         | MG703622    | -            | MG703693          | -            | MG703763         | MG703799         | MG703834         | MG703869         | -             | MG703941      | MG703977    | -                | -           | -           |
| <i>Cotoneaster multiflorus</i> Bunge                               | MG703588         | MG703623    | MG703658     | MG703694          | MG703730     | MG703764         | MG703800         | MG703835         | MG703870         | MG703906      | MG703942      | MG703978    | MG704011         | MG704050    | MG704082    |
| <i>Crataegus kansuensis</i> E. H. Wilson                           | MG703589         | MG703624    | MG703659     | MG703695          | MG703731     | MG703765         | MG703801         | MG703836         | MG703871         | MG703907      | MG703943      | MG703979    | MG704012         | MG704051    | MG704083    |
| <i>Cydonia oblonga</i> Mill.                                       | MG703590         | MG703625    | MG703660     | MG703696          | MG703732     | MG703766         | MG703802         | MG703837         | MG703872         | MG703908      | MG703944      | MG703980    | MG704013         | MG704052    | MG704084    |
| <i>Dichotomanthes tristanicarpa</i> Kurz                           | MG703591         | MG703626    | MG703661     | MG703697          | MG703733     | MG703767         | MG703803         | MG703838         | MG703873         | MG703909      | MG703945      | MG703981    | MG704014         | MG704053    | MG704085    |
| <i>Docynia delavayi</i> (Franch.) C. K. Schneid.                   | MG703592         | MG703627    | MG703662     | MG703698          | MG703734     | MG703768         | MG703804         | MG703839         | MG703874         | MG703910      | MG703946      | MG703982    | MG704015         | MG704054    | MG704086    |
| <i>Docyniopsis tschonoskii</i> (Maxim.) Koidz.                     | MG703593         | MG703628    | MG703663     | MG703699          | MG703735     | MG703769         | MG703805         | MG703840         | MG703875         | MG703911      | MG703947      | MG703983    | MG704016         | MG704055    | MG704087    |
| <i>Eriobotrya japonica</i> (Thunb.) Lindl.                         | MG703594         | MG703629    | MG703664     | MG703700          | MG703736     | MG703770         | MG703806         | MG703841         | MG703876         | MG703912      | MG703948      | MG703984    | MG704017         | MG704056    | MG704088    |
| <i>Eriolobus kansuensis</i> (Batalin) C. K. Schneid.               | -                | -           | MG703665     | MG703701          | -            | MG703771         | -                | MG703842         | -                | MG703913      | MG703949      | -           | MG704018         | MG704047    | -           |
| <i>Gillenia trifoliata</i> (L.) Moench                             | MG703595         | MG703630    | MG703666     | MG703702          | MG703737     | MG703772         | MG703807         | MG703843         | MG703877         | MG703914      | MG703950      | MG703985    | MG704019         | MG704057    | MG704089    |
| <i>Heteromeles arbutifolia</i> (Dryand.) M. Roem.                  | -                | MG703631    | MG703667     | MG703703          | -            | MG703773         | -                | -                | MG703878         | MG703915      | MG703951      | -           | MG704020         | MG704045    | MG704090    |
| <i>Kageneckia crataegifolia</i> Lindl.                             | MG703596         | MG703632    | MG703668     | MG703704          | MG703738     | MG703774         | MG703808         | MG703844         | MG703879         | MG703916      | MG703952      | MG703986    | MG704021         | MG704058    | MG704091    |
| <i>Lindleyella schiedeana</i> (Schltdl.) Rydb.                     | -                | MG703633    | MG703669     | MG703705          | MG703739     | -                | -                | -                | MG703880         | MG703917      | -             | -           | MG704022         | MG704046    | MG704092    |
| <i>Malacomeles denticulata</i> (Kunth) G. N. Jones                 | MG703597         | MG703634    | -            | MG703706          | -            | MG703775         | MG703809         | MG703845         | MG703881         | -             | MG703953      | MG703987    | -                | -           | -           |
| <i>Malus baccata</i> (L.) Borkh.                                   | MG703598         | MG703635    | MG703670     | MG703707          | MG703740     | MG703776         | MG703810         | MG703846         | MG703882         | MG703918      | MG703954      | MG703988    | MG704023         | MG704059    | MG704093    |
| <i>Mespilus germanica</i> L.                                       | MG703599         | MG703636    | MG703671     | MG703708          | MG703741     | MG703777         | MG703811         | MG703847         | MG703883         | MG703919      | MG703955      | MG703989    | MG704024         | MG704060    | MG704094    |
| <i>Micromeles folgneri</i> C. K. Schneid.                          | MG703600         | MG703637    | MG703672     | MG703709          | MG703742     | MG703778         | MG703812         | MG703848         | MG703884         | MG703920      | MG703956      | MG703990    | MG704025         | MG704061    | MG704095    |
| <i>Osteomeles schwerinae</i> C. K. Schneid.                        | MG703601         | MG703638    | MG703673     | MG703710          | MG703743     | MG703779         | MG703813         | MG703849         | MG703885         | MG703921      | MG703957      | MG703991    | MG704026         | MG704062    | MG704096    |
| <i>Peraphyllum ramosissimum</i> Nutt. ex Torr. & A. Gray           | MG703602         | MG703639    | MG703674     | MG703711          | MG703744     | MG703780         | MG703814         | MG703850         | MG703886         | MG703922      | MG703958      | MG703992    | MG704027         | MG704063    | MG704097    |
| <i>Photinia serratifolia</i> (Desf.) Kalkman                       | MG703603         | MG703640    | MG703675     | MG703712          | MG703745     | MG703781         | MG703815         | MG703851         | MG703887         | MG703923      | MG703959      | MG703993    | MG704028         | MG704064    | MG704098    |
| <i>Pourthiaea arguta</i> var. <i>salicifolia</i> (Decne.) Hook. f. | MG703604         | MG703641    | MG703676     | MG703713          | MG703746     | MG703782         | MG703816         | MG703852         | MG703888         | MG703924      | MG703960      | MG703994    | MG704029         | MG704065    | MG704099    |
| <i>Pseudocydonia sinensis</i> (Dum.Cours.) C. K. Schneid.          | MG703605         | MG703642    | MG703677     | MG703714          | MG703747     | MG703783         | MG703817         | MG703853         | MG703889         | MG703925      | MG703961      | MG703995    | MG704030         | MG704066    | MG704100    |
| <i>Pyracantha fortuneana</i> (Maxim.) H. L. Li                     | MG703606         | MG703643    | MG703678     | MG703715          | MG703748     | MG703784         | MG703818         | MG703854         | MG703890         | MG703926      | MG703962      | MG703996    | MG704031         | MG704067    | MG704101    |
| <i>Pyrus bretschneideri</i> Rehder                                 | MG703607         | MG703644    | MG703679     | MG703716          | MG703749     | MG703785         | MG703819         | MG703855         | MG703891         | MG703927      | MG703963      | MG703997    | MG704032         | MG704068    | MG704102    |
| <i>Rhaphiolepis indica</i> (L.) Lindl.                             | MG703608         | MG703645    | MG703680     | MG703717          | MG703750     | MG703786         | MG703820         | MG703856         | MG703892         | MG703928      | MG703964      | MG703998    | MG704033         | MG704069    | MG704103    |
| <i>Sorbus aucuparia</i> L.                                         | MG703609         | MG703646    | MG703681     | MG703718          | MG703751     | MG703787         | MG703821         | MG703857         | MG703893         | MG703929      | MG703965      | MG703999    | MG704034         | MG704070    | MG704104    |
| <i>Stranvaesia davidiana</i> Decne.                                | MG703610         | MG703647    | MG703682     | MG703719          | MG703752     | MG703788         | MG703822         | MG703858         | MG703894         | MG703930      | MG703966      | MG704000    | MG704035         | MG704071    | MG704105    |
| <i>Vauquelinia corymbosa</i> Corr. & ex Humb. & Bonpl.             | MG703611         | MG703648    | MG703683     | MG703720          | MG703753     | MG703789         | MG703823         | MG703859         | MG703895         | MG703931      | MG703967      | MG704001    | MG704036         | MG704072    | MG704106    |
